# Supplementary material for: Microbial Diversity Using a Metataxonomic Approach, Associated with Coffee Fermentation Processes in the Department of Quindío, Colombia
Source: MDPI journal article supplement (doi:10.3390/fermentation9040343), 2023-03-29
Supplement: s1 [file s1]

# Microbial diversity using Metataxonomic approach, associated with different coffee fermentation processes in the Department of Quindío, Colombia

## Supplementary Material

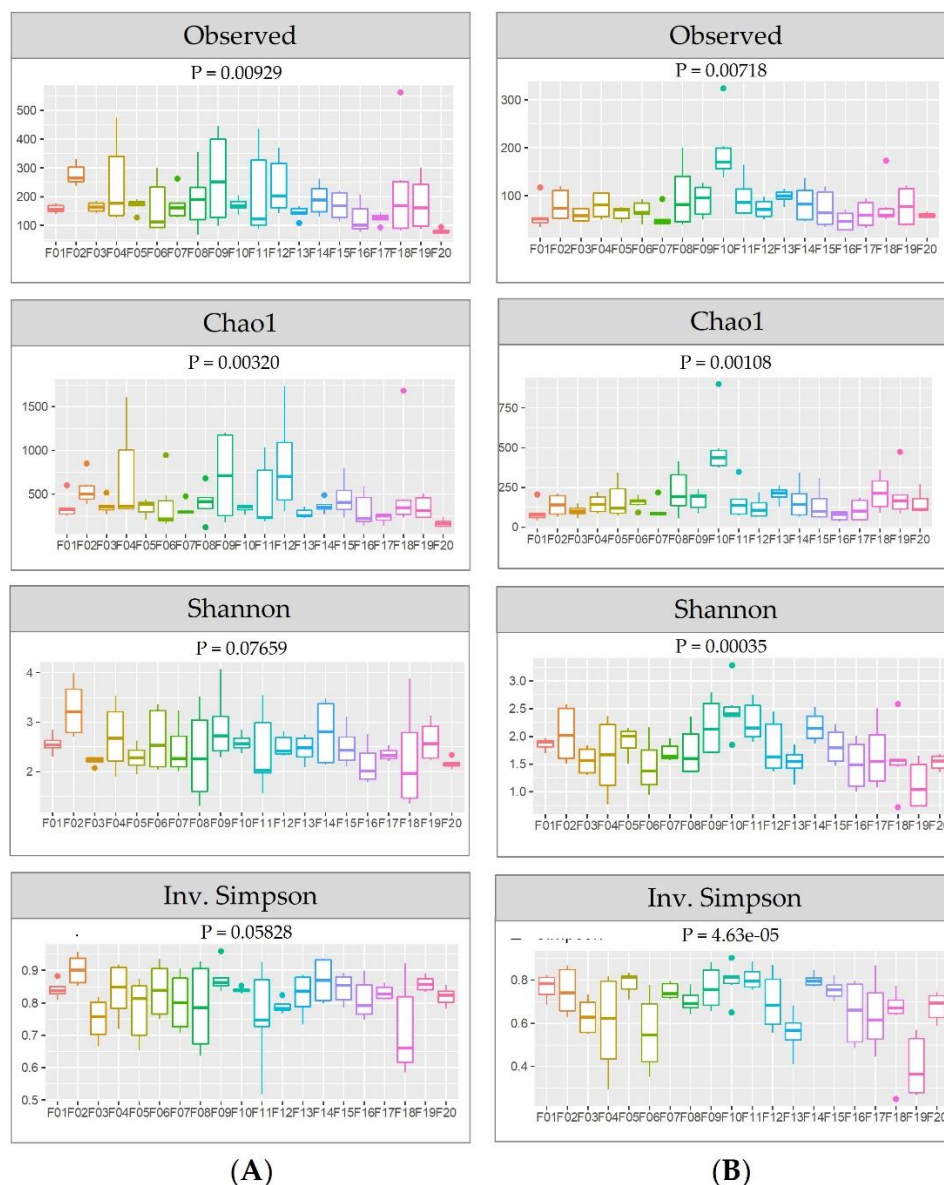

**Figure S1.** Boxplot of diversity indexes, namely Observed, Chao1, Shannon, and Inverse Simpson for bacterial communities (A), and as well as for yeast/fungal microbiota (B), from sampled studied farms.

**Table S1.** Information on fermentation type performed in each sampled farm, pH and temperature of the coffee bean mass and sensory quality.

| Sample-id | Fermentation type                                       | Time (h) | Beginning of fermentation |                  | End of fermentation |                  | Sensory Quality    |                  |
|-----------|---------------------------------------------------------|----------|---------------------------|------------------|---------------------|------------------|--------------------|------------------|
|           |                                                         |          | pH                        | Temperature (°C) | pH                  | Temperature (°C) | SCA Score (points) | Deffects         |
| F01       | Mix of de-pulped coffee batches, Under water, Prolonged | 72       | 5.61 ± 0.13               | 19.77 ± 0.49     | 4.28 ± 0.34         | 23.13 ± 0.85     | 42.0 ± 0.0         | <b>Phenol</b>    |
| F02       | Under water                                             | 16       | 5.00 ± 0.19               | 20.8 ± 0.51      | 3.73 ± 0.05         | 20.13 ± 0.37     | 80.8 ± 0.3         | None             |
| F03       | Traditional or spontaneous                              | 14       | 5.72 ± 0.04               | 23.47 ± 0.30     | 3.21 ± 0.06         | 22.37 ± 0.37     | 80.1 ± 1.3         | None             |
| F04       | Traditional or spontaneous                              | 15       | 5.10 ± 0.17               | 22.00 ± 0.00     | 4.13 ± 0.11         | 22.00 ± 0.00     | 81.8 ± 0.9         | None             |
| F05       | Mix of de-pulped coffee batches, Under water, Prolonged | 48       | 5.07 ± 0.11               | 21.17 ± 0.28     | 3.83 ± 0.11         | 19.33 ± 0.57     | 81.7 ± 0.3         | None             |
| F06       | Under Water                                             | 14       | 5.93 ± 0.02               | 19.13 ± 0.25     | 4.51 ± 0.13         | 17.70 ± 0.26     | 82.7 ± 1.9         | None             |
| F07       | Under Water                                             | 21       | 5.07 ± 0.11               | 22.67 ± 0.57     | 4.23 ± 0.05         | 20.67 ± 0.57     | 80.2 ± 2.1         | None             |
| F08       | Prolonged                                               | 39       | 5.05 ± 0.28               | 25.13 ± 0.15     | 3.50 ± 0.17         | 26.33 ± 1.52     | 82.5 ± 0.8         | None             |
| F09       | Traditional or spontaneous                              | 16       | 5.25 ± 0.26               | 23.93 ± 0.25     | 3.37 ± 0.06         | 19.67 ± 0.25     | 80.2 ± 1.7         | None             |
| F10       | Traditional or spontaneous                              | 22.5     | 5.90 ± 0.02               | 23.6 ± 0.36      | 4.45 ± 0.10         | 21.00 ± 0.20     | 42.0 ± 0.0         | <b>Eartly</b>    |
| F11       | Traditional or spontaneous                              | 16       | 5.65 ± 0.07               | 25.13 ± 0.15     | 3.00 ± 0.10         | 22.47 ± 0.28     | 80.8 ± 1.3         | None             |
| F12       | Under Water, Prolonged                                  | 72       | 5.43 ± 0.14               | 20.67 ± 0.32     | 4.11 ± 0.17         | 22.20 ± 0.20     | 80.7 ± 0.6         | None             |
| F13       | Traditional or spontaneous                              | 16       | 5.54 ± 0.04               | 22.1 ± 0.43      | 4.50 ± 0.07         | 20.47 ± 0.11     | 80.8 ± 0.1         | None             |
| F14       | Traditional or spontaneous                              | 15       | 5.57 ± 0.09               | 24.77 ± 1.01     | 3.29 ± 0.12         | 22.33 ± 0.25     | 80.6 ± 0.9         | None             |
| F15       | Traditional or spontaneous                              | 17       | 5.66 ± 0.07               | 26.47 ± 0.23     | 3.35 ± 0.09         | 25.33 ± 1.19     | 53.0 ± 1.4         | <b>Eartly</b>    |
| F16       | Traditional or spontaneous                              | 19       | 5.95 ± 0.05               | 21.90 ± 0.69     | 3.54 ± 0.09         | 21.93 ± 0.40     | 79.0 ± 1.1         | None             |
| F17       | Traditional or spontaneous                              | 16       | 5.47 ± 0.09               | 24.60 ± 0.10     | 3.73 ± 0.076        | 18.43 ± 0.11     | 84.0 ± 0.2         | None             |
| F18       | Traditional or spontaneous                              | 15       | 5.50 ± 0.15               | 25.9 ± 0.00      | 3.51 ± 0.11         | 21.07 ± 0.35     | 52.0 ± 7.1         | <b>Fermented</b> |
| F19       | Traditional or spontaneous                              | 15       | 5.72 ± 0.03               | 21.67 ± 0.15     | 4.49 ± 0.16         | 19.67 ± 0.05     | 79.8 ± 0.2         | None             |
| F20       | Induced anaerobic                                       | 72       | 4.34 ± 0.04               | 24.90 ± 0.43     | 4.06 ± 0.02         | 22.30 ± 0.00     | 83.5 ± 0.4         | None             |

Data are means of three replicates ± standard deviation

**Table S2.** Volatile organic compounds (GC-MS peak areas  $\times 10^4$ ) found in green coffee beans from studied sampled farms.

[illegible]

|                                                         |       |       |       |       |       |       |       |       |       |       |       |       |       |       |       |       |       |       |       |        |
|---------------------------------------------------------|-------|-------|-------|-------|-------|-------|-------|-------|-------|-------|-------|-------|-------|-------|-------|-------|-------|-------|-------|--------|
| 2-acetoxymethyl-1,2,3-trimethylbutyl ester, acetic acid | 18.0  | n.d   | 261.4 | n.d    |
| 2-Hexanol, acetate                                      | 18.0  | n.d   | 235.3 | n.d    |
| Sec-butyl ester, cyanic acid                            | 15.6  | n.d   | 53.6  | n.d   | n.d   | 204.7 | n.d   | n.d   | n.d   | n.d    |
| Nonyl ester, cyclopropanecarboxylic acid                | 18.1  | n.d   | 325.1 | n.d   | n.d    |
| 3-hydroxybutanone                                       | 23.6  | n.d   | 5856.1 |
| 6-methyl-(E)-3,5-Heptadien-2-one                        | 23.5  | n.d   | 52.6  | 23.0  | 15.0  | n.d   | n.d   | n.d   | n.d   | 19.7  | n.d   | n.d   | 29.1  | n.d    |
| <b>Furans &amp; Pyrazines</b>                           |       |       |       |       |       |       |       |       |       |       |       |       |       |       |       |       |       |       |       |        |
| tetrahydro-2,5-dimethyl-cis-furan                       | 27.3  | n.d   | 21.8  | n.d   | n.d   | n.d   | 42.9  | n.d   | n.d   | n.d   | n.d   | n.d   | n.d    |
| tetrahydro-2,5-dimethyl-furan                           | 27.3  | n.d   | n.d   | 29.0  | n.d   | n.d   | n.d   | n.d   | 42.6  | n.d   | 49.0  | n.d    |
| Linalool oxide                                          | 31.2  | n.d   | 101.0  |
| 2-methoxy-3-(2-methylpropyl)-pyrazine                   | 24.6  | 418.6 | 296.6 | 447.1 | 291.7 | 212.6 | 286.1 | 247.4 | 437.1 | 296.5 | 451.7 | 215.5 | 318.8 | 315.7 | 418.5 | 442.5 | 261.6 | 388.3 | 364.1 | n.d    |
| tetramethyl-pyrazine                                    | 31.4  | n.d   | 140.7  |
| <b>Aldehydes</b>                                        |       |       |       |       |       |       |       |       |       |       |       |       |       |       |       |       |       |       |       |        |
| 2,5-Dihydroxybenzaldehyde, 2TMS derivative              | 24.2  | 115.4 | 47.8  | 58.2  | 62.6  | 68.1  | 60.7  | 61.2  | 68.3  | 68.6  | 74.9  | 75.1  | n.d   | 76.3  | 84.2  | 79.8  | 81.3  | 89.6  | 89.8  | n.d    |
| 4-propyl-benzaldehyde                                   | 32.1  | 24.6  | 30.5  | 36.0  | 30.6  | 50.1  | 24.8  | 31.3  | 23.0  | 52.9  | 54.3  | 55.4  | 52.2  | n.d   | 45.4  | n.d   | n.d   | n.d   | n.d   | n.d    |
| 2-ethyl-4-pentenal                                      | 15.6  | n.d   | 110.0 | n.d    |
| 3-ethyl-benzaldehyde                                    | 31.9  | n.d   | n.d   | n.d   | 8.4   | n.d    |
| 3,4-dimethyl-benzaldehyde                               | 31.8  | n.d   | 9.5   | 10.2  | 10.4  | 13.9  | n.d    |
| <b>Pyridines &amp; Pyrrolidines</b>                     |       |       |       |       |       |       |       |       |       |       |       |       |       |       |       |       |       |       |       |        |
| 2,6-Lutidine                                            | 17.08 | n.d   | 332.8 | 374.3 | n.d   | n.d   | n.d   | n.d   | n.d   | 150.2 | 121.1 | 294.0 | 167.8 | 627.0 | n.d   | 235.4 | 144.0 | n.d   | n.d   | n.d    |
| 2,3-dimethyl-Pyridine                                   | 17.09 | n.d   | n.d   | n.d   | n.d   | 206.1 | n.d   | 229.0 | n.d   | n.d   | n.d   | n.d   | n.d   | n.d   | 405.7 | n.d   | n.d   | 179.7 | n.d   | n.d    |
| 3-ethyl-1,3-dimethyl-2,5-pyrrolidinedione               | 31.1  | n.d   | 37.1  | 41.6  | n.d   | 42.2  | 36.5  | 36.7  | 34.4  | 42.5  | 36.7  | 44.9  | 46.7  | 34.7  | 38.0  | 44.3  | 57.9  | 44.4  | 51.5  | n.d    |
| <b>Lactones</b>                                         |       |       |       |       |       |       |       |       |       |       |       |       |       |       |       |       |       |       |       |        |
| Butyrolactone                                           | 28.7  | 9.0   | n.d   | n.d   | n.d   | 66.1  | n.d   | n.d   | n.d   | 33.7  | 41.1  | 49.4  | n.d   | 26.6  | 36.7  | 40.0  | 49.6  | 46.9  | 25.1  | 227.6  |
| dihydro-5-methyl-2(3H)-furanone                         | 27.3  | 25.2  | 35.7  | n.d   | 24.7  | n.d   | n.d   | 50.3  | n.d   | n.d   | 53.0  | n.d   | 42.2  | n.d   | 49.5  | 24.3  | 28.7  | 40.8  | n.d   | n.d    |



**Table S3.** Results of Illumina MiSeq amplicon sequencing of bacterial 16S and microbial community richness and diversity

| Sample | Read Count | Q30 (%) | nseqs | Coverage | Observed (Sobs) | Chao1 | Shannon | Simpson's Reciprocal | D     | 1-D   |
|--------|------------|---------|-------|----------|-----------------|-------|---------|----------------------|-------|-------|
| CD01R1 | 173692     | 74.41   | 4.42  | 0.98     | 155             | 255   | 2.3     | 5.2                  | 0.192 | 0.808 |
| CD01R2 | 166292     | 74.15   | 4.404 | 0.97     | 178             | 328.6 | 2.5     | 6.4                  | 0.156 | 0.844 |
| CD01R3 | 182106     | 74.77   | 4.413 | 0.97     | 174             | 348.8 | 2.8     | 8.5                  | 0.118 | 0.882 |
| CD02R1 | 247136     | 73.28   | 4.406 | 0.97     | 179             | 358   | 2.2     | 3.3                  | 0.303 | 0.697 |
| CD02R2 | 208022     | 74.66   | 4.422 | 0.97     | 187             | 379.6 | 2.2     | 3.5                  | 0.286 | 0.714 |
| CD02R3 | 212526     | 74.13   | 4.423 | 0.97     | 149             | 312.1 | 2       | 2.9                  | 0.345 | 0.655 |
| CD03R1 | 154348     | 74.38   | 4.432 | 0.97     | 183             | 385.9 | 2.4     | 6.8                  | 0.147 | 0.853 |
| CD03R2 | 202816     | 73.82   | 4.412 | 0.97     | 191             | 441.7 | 2.6     | 7.9                  | 0.127 | 0.873 |
| CD03R3 | 179298     | 75.32   | 4.429 | 0.97     | 172             | 417.2 | 2.3     | 6.4                  | 0.156 | 0.844 |
| CD04R1 | 189134     | 73.38   | 4.399 | 0.96     | 263             | 477   | 3.2     | 10.6                 | 0.094 | 0.906 |
| CD04R2 | 217598     | 74.83   | 4.418 | 0.97     | 177             | 307.2 | 2.3     | 6.3                  | 0.159 | 0.841 |
| CD04R3 | 190488     | 73.51   | 4.435 | 0.97     | 179             | 304.1 | 2.8     | 8.9                  | 0.112 | 0.888 |
| CD05R1 | 185172     | 74.58   | 4.617 | 0.94     | 447             | 1204  | 4       | 24.2                 | 0.041 | 0.959 |
| CD05R2 | 174110     | 73.13   | 4.604 | 0.93     | 408             | 1184  | 2.9     | 6                    | 0.167 | 0.833 |
| CD05R3 | 171270     | 74.95   | 4.583 | 0.94     | 377             | 1148  | 3.1     | 8.3                  | 0.120 | 0.880 |
| CD06R1 | 217300     | 73.31   | 4.392 | 0.98     | 133             | 218   | 1.5     | 2                    | 0.500 | 0.500 |
| CD06R2 | 239148     | 74.29   | 4.562 | 0.94     | 392             | 956.7 | 3.2     | 11                   | 0.091 | 0.909 |
| CD06R3 | 215262     | 74.5    | 4.562 | 0.93     | 438             | 1034  | 3.5     | 13.3                 | 0.075 | 0.925 |
| CD07R1 | 198040     | 74.08   | 4.366 | 0.98     | 146             | 230   | 2.6     | 7.6                  | 0.132 | 0.868 |
| CD07R2 | 174138     | 72.14   | 4.385 | 0.98     | 163             | 247.4 | 2.7     | 8.5                  | 0.118 | 0.882 |
| CD07R3 | 192356     | 74.65   | 4.382 | 0.98     | 167             | 357.5 | 2.7     | 8.8                  | 0.114 | 0.886 |
| CD08R1 | 198626     | 74.35   | 4.406 | 0.97     | 221             | 346   | 3.1     | 9.3                  | 0.108 | 0.892 |
| CD08R2 | 221032     | 74.8    | 4.396 | 0.96     | 219             | 566.5 | 2.7     | 8.5                  | 0.118 | 0.882 |
| CD08R3 | 244570     | 73.94   | 4.39  | 0.96     | 199             | 802   | 2.6     | 7.9                  | 0.127 | 0.873 |
| CD09R1 | 200872     | 72.37   | 4.405 | 0.98     | 137             | 271.5 | 2.2     | 5.5                  | 0.182 | 0.818 |
| CD09R2 | 208272     | 73.25   | 4.413 | 0.98     | 145             | 283   | 2.2     | 5.3                  | 0.189 | 0.811 |
| CD09R3 | 207598     | 73.62   | 4.37  | 0.98     | 121             | 194.6 | 2.3     | 6.8                  | 0.147 | 0.853 |
| CD10R1 | 161192     | 74.05   | 4.406 | 0.96     | 301             | 507   | 3.1     | 9.3                  | 0.108 | 0.892 |
| CD10R2 | 222002     | 74.89   | 4.373 | 0.97     | 224             | 381.7 | 2.9     | 8                    | 0.125 | 0.875 |
| CD10R3 | 211104     | 72.89   | 4.409 | 0.96     | 249             | 486.2 | 2.8     | 7.8                  | 0.128 | 0.872 |
| CD11R1 | 171006     | 74.58   | 4.428 | 0.96     | 254             | 450.2 | 2.7     | 6.8                  | 0.147 | 0.853 |
| CD11R2 | 212470     | 74.14   | 4.444 | 0.97     | 239             | 446.2 | 2.9     | 8                    | 0.125 | 0.875 |
| CD11R3 | 171444     | 73.52   | 4.434 | 0.96     | 252             | 550   | 2.7     | 7                    | 0.143 | 0.857 |
| CD12R1 | 262032     | 73.8    | 4.449 | 0.98     | 127             | 327.1 | 1.8     | 3.5                  | 0.286 | 0.714 |
| CD12R2 | 195444     | 74.01   | 4.447 | 0.98     | 134             | 330.8 | 2.2     | 4.4                  | 0.227 | 0.773 |
| CD12R3 | 164304     | 73.33   | 4.438 | 0.97     | 140             | 362.5 | 2.2     | 5                    | 0.200 | 0.800 |
| CD13R1 | 197588     | 73.88   | 4.456 | 0.98     | 91              | 197.2 | 2       | 4.2                  | 0.238 | 0.762 |

|        |        |       |       |      |     |       |     |      |       |       |
|--------|--------|-------|-------|------|-----|-------|-----|------|-------|-------|
| CD13R2 | 165690 | 74.05 | 4.458 | 0.98 | 94  | 192   | 2   | 4    | 0.250 | 0.750 |
| CD13R3 | 177104 | 74.16 | 4.439 | 0.98 | 92  | 165.9 | 2.1 | 4.3  | 0.233 | 0.767 |
| CD14R1 | 165600 | 74.55 | 4.457 | 0.98 | 111 | 324.2 | 1.5 | 3    | 0.333 | 0.667 |
| CD14R2 | 160404 | 73.42 | 4.462 | 0.99 | 69  | 124.5 | 1.3 | 2.7  | 0.370 | 0.630 |
| CD14R3 | 201974 | 73.57 | 4.462 | 0.97 | 152 | 380   | 1.6 | 3.1  | 0.323 | 0.677 |
| CD15R1 | 187036 | 74.15 | 4.425 | 0.97 | 163 | 372.3 | 2.4 | 6    | 0.167 | 0.833 |
| CD15R2 | 128144 | 73.85 | 4.452 | 0.97 | 173 | 375.1 | 2.5 | 6.3  | 0.159 | 0.841 |
| CD15R3 | 171930 | 75.34 | 4.441 | 0.98 | 137 | 267.7 | 2.3 | 5.8  | 0.172 | 0.828 |
| CD16R1 | 194964 | 74.35 | 4.421 | 0.97 | 162 | 427.7 | 2.4 | 5    | 0.200 | 0.800 |
| CD16R2 | 176962 | 74.24 | 4.427 | 0.97 | 162 | 465.1 | 2.3 | 4.3  | 0.233 | 0.767 |
| CD16R3 | 181060 | 74.88 | 4.448 | 0.98 | 144 | 306.5 | 2.3 | 4.5  | 0.222 | 0.778 |
| CD17R1 | 195584 | 75.84 | 4.444 | 0.98 | 132 | 274.5 | 2.1 | 5.1  | 0.196 | 0.804 |
| CD17R2 | 164744 | 72.82 | 4.445 | 0.97 | 146 | 489.4 | 2.1 | 5.2  | 0.192 | 0.808 |
| CD17R3 | 188858 | 73.24 | 4.446 | 0.97 | 152 | 330   | 2.2 | 4.9  | 0.204 | 0.796 |
| CD18R1 | 201058 | 81.19 | 4.456 | 0.98 | 102 | 204.6 | 1.9 | 4.5  | 0.222 | 0.778 |
| CD18R2 | 176912 | 81.64 | 4.455 | 0.99 | 78  | 183.1 | 1.7 | 3.9  | 0.256 | 0.744 |
| CD18R3 | 189156 | 80.99 | 4.46  | 0.98 | 100 | 238.6 | 1.7 | 4.1  | 0.244 | 0.756 |
| CD19R1 | 139458 | 78.9  | 4.46  | 0.98 | 100 | 301.6 | 1.5 | 2.5  | 0.400 | 0.600 |
| CD19R2 | 222388 | 81.83 | 4.478 | 0.98 | 88  | 259.1 | 1.4 | 2.6  | 0.385 | 0.615 |
| CD19R3 | 166034 | 81.51 | 4.48  | 0.98 | 82  | 236   | 1.3 | 2.4  | 0.417 | 0.583 |
| CD20R1 | 198964 | 84.06 | 4.468 | 0.99 | 72  | 150.1 | 2.1 | 6.1  | 0.164 | 0.836 |
| CD20R2 | 186136 | 82.13 | 4.464 | 0.99 | 76  | 124.4 | 2   | 4.5  | 0.222 | 0.778 |
| CD20R3 | 196338 | 82.44 | 4.47  | 0.98 | 85  | 246.1 | 2.1 | 4.9  | 0.204 | 0.796 |
| CF01R1 | 207418 | 75.3  | 4.379 | 0.96 | 313 | 612.5 | 3.7 | 17.1 | 0.058 | 0.942 |
| CF01R2 | 184516 | 74.8  | 4.388 | 0.96 | 332 | 851.1 | 4   | 24.2 | 0.041 | 0.959 |
| CF01R3 | 157132 | 73.59 | 4.416 | 0.97 | 275 | 384.4 | 3.5 | 14.1 | 0.071 | 0.929 |
| CF02R1 | 197730 | 74.9  | 4.641 | 0.92 | 477 | 1605  | 3.5 | 11.5 | 0.087 | 0.913 |
| CF02R2 | 213326 | 74.7  | 4.323 | 0.97 | 214 | 364   | 3.2 | 12.3 | 0.081 | 0.919 |
| CF02R3 | 167338 | 75.19 | 4.571 | 0.93 | 383 | 1220  | 3.1 | 9.5  | 0.105 | 0.895 |
| CF03R1 | 193450 | 74.75 | 4.481 | 0.96 | 267 | 487.6 | 3.3 | 10.6 | 0.094 | 0.906 |
| CF03R2 | 200710 | 75.82 | 4.399 | 0.98 | 133 | 235.7 | 2.9 | 10.5 | 0.095 | 0.905 |
| CF03R3 | 179928 | 73.12 | 4.545 | 0.95 | 302 | 947.4 | 3.3 | 15.2 | 0.066 | 0.934 |
| CF04R1 | 190462 | 74.45 | 4.336 | 0.97 | 234 | 465.6 | 3.1 | 11.3 | 0.088 | 0.912 |
| CF04R2 | 179782 | 74.32 | 4.392 | 0.96 | 229 | 456.5 | 2.8 | 9.2  | 0.109 | 0.891 |
| CF04R3 | 223600 | 75.42 | 4.309 | 0.95 | 357 | 682.5 | 3.5 | 13.9 | 0.072 | 0.928 |
| CF05R1 | 192506 | 74.99 | 4.401 | 0.98 | 162 | 382   | 2.7 | 6.2  | 0.161 | 0.839 |
| CF05R2 | 176102 | 74.01 | 4.397 | 0.97 | 206 | 334.7 | 2.6 | 6.1  | 0.164 | 0.836 |
| CF05R3 | 196922 | 73.32 | 4.351 | 0.97 | 188 | 321.6 | 2.8 | 6.8  | 0.147 | 0.853 |
| CF06R1 | 216276 | 74.93 | 4.544 | 0.94 | 340 | 1732  | 2.8 | 5.6  | 0.179 | 0.821 |
| CF06R2 | 179078 | 75.65 | 4.557 | 0.94 | 370 | 1141  | 2.7 | 4.6  | 0.217 | 0.783 |
| CF06R3 | 182094 | 74.83 | 4.535 | 0.96 | 244 | 944.4 | 2.3 | 4.5  | 0.222 | 0.778 |

|        |        |       |       |      |     |       |     |      |       |       |
|--------|--------|-------|-------|------|-----|-------|-----|------|-------|-------|
| CF07R1 | 185230 | 75.3  | 4.39  | 0.97 | 228 | 368.6 | 3.3 | 15.9 | 0.063 | 0.937 |
| CF07R2 | 166784 | 74.73 | 4.382 | 0.97 | 227 | 332.6 | 3.3 | 14.3 | 0.070 | 0.930 |
| CF07R3 | 170518 | 74.3  | 4.389 | 0.97 | 263 | 390.6 | 3.4 | 15   | 0.067 | 0.933 |
| CF08R1 | 151394 | 72.62 | 4.413 | 0.99 | 85  | 136.2 | 2   | 5    | 0.200 | 0.800 |
| CF08R2 | 186264 | 74.15 | 4.512 | 0.96 | 208 | 593   | 2.7 | 9.9  | 0.101 | 0.899 |
| CF08R3 | 187070 | 74.38 | 4.504 | 0.97 | 177 | 540   | 2.4 | 7.9  | 0.127 | 0.873 |
| CF09R1 | 196030 | 74.71 | 4.611 | 0.91 | 563 | 1682  | 3.8 | 13   | 0.077 | 0.923 |
| CF09R2 | 200606 | 75.07 | 4.374 | 0.97 | 236 | 392.5 | 2.3 | 3.3  | 0.303 | 0.697 |
| CF09R3 | 176770 | 73.45 | 4.38  | 0.96 | 259 | 444   | 2.9 | 7.1  | 0.141 | 0.859 |
| CF10R1 | 169138 | 73.08 | 4.439 | 0.98 | 156 | 322.1 | 2.5 | 5.9  | 0.169 | 0.831 |
| CF10R2 | 161102 | 73.15 | 4.44  | 0.98 | 140 | 257.3 | 2.6 | 6.7  | 0.149 | 0.851 |
| CF10R3 | 200342 | 73.68 | 4.443 | 0.98 | 147 | 603.8 | 2.4 | 5.8  | 0.172 | 0.828 |
| CF11R1 | 227690 | 75.29 | 4.45  | 0.97 | 155 | 353   | 2.1 | 4.9  | 0.204 | 0.796 |
| CF11R2 | 179838 | 75.86 | 4.437 | 0.98 | 142 | 272.5 | 2.2 | 5.5  | 0.182 | 0.818 |
| CF11R3 | 187662 | 75.53 | 4.435 | 0.97 | 174 | 519   | 2.2 | 5    | 0.200 | 0.800 |
| CF12R1 | 161318 | 74.64 | 4.46  | 0.98 | 128 | 208   | 2.1 | 4.5  | 0.222 | 0.778 |
| CF12R2 | 145182 | 75.07 | 4.457 | 0.97 | 180 | 382   | 2.1 | 3    | 0.333 | 0.667 |
| CF12R3 | 193192 | 74.63 | 4.438 | 0.97 | 168 | 271   | 1.9 | 2.8  | 0.357 | 0.643 |
| CF13R1 | 172744 | 75.23 | 4.45  | 0.98 | 129 | 287.8 | 2.1 | 4.1  | 0.244 | 0.756 |
| CF13R2 | 179302 | 75.02 | 4.444 | 0.98 | 130 | 280   | 2   | 3.4  | 0.294 | 0.706 |
| CF13R3 | 139376 | 73.08 | 4.434 | 0.98 | 146 | 293.2 | 2   | 3.5  | 0.286 | 0.714 |
| CF14R1 | 189536 | 75.14 | 4.45  | 0.98 | 128 | 282.5 | 2.4 | 7.6  | 0.132 | 0.868 |
| CF14R2 | 174858 | 74.73 | 4.451 | 0.98 | 99  | 177.4 | 2.2 | 6.6  | 0.152 | 0.848 |
| CF14R3 | 229568 | 76.04 | 4.445 | 0.98 | 128 | 247.4 | 2.4 | 7    | 0.143 | 0.857 |
| CF15R1 | 175758 | 74.89 | 4.459 | 0.98 | 114 | 233.1 | 2   | 3.8  | 0.263 | 0.737 |
| CF15R2 | 202004 | 75.61 | 4.469 | 0.98 | 98  | 238   | 1.9 | 3.6  | 0.278 | 0.722 |
| CF15R3 | 182058 | 75.12 | 4.46  | 0.98 | 88  | 186   | 2   | 4    | 0.250 | 0.750 |
| CF16R1 | 126600 | 74.39 | 4.415 | 0.98 | 140 | 333.6 | 2.3 | 5.1  | 0.196 | 0.804 |
| CF16R2 | 133320 | 75.47 | 4.427 | 0.98 | 109 | 254.4 | 2   | 3.7  | 0.270 | 0.730 |
| CF16R3 | 145842 | 74.49 | 4.43  | 0.98 | 142 | 262   | 2.2 | 4.6  | 0.217 | 0.783 |
| CF17R1 | 185916 | 74.95 | 4.45  | 0.98 | 125 | 473.6 | 2.1 | 4.6  | 0.217 | 0.783 |
| CF17R2 | 229354 | 82.41 | 4.446 | 0.98 | 113 | 235   | 2.2 | 5.9  | 0.169 | 0.831 |
| CF17R3 | 150914 | 81.33 | 4.441 | 0.98 | 137 | 320.4 | 2.2 | 5    | 0.200 | 0.800 |
| CF18R1 | 216914 | 83.21 | 4.456 | 0.99 | 93  | 140.8 | 2.2 | 5.3  | 0.189 | 0.811 |
| CF18R2 | 209600 | 82.22 | 4.462 | 0.98 | 131 | 262.4 | 2.4 | 6.1  | 0.164 | 0.836 |
| CF18R3 | 150292 | 82.32 | 4.46  | 0.98 | 120 | 238.1 | 2.5 | 7.2  | 0.139 | 0.861 |
| CF19R1 | 169754 | 80.61 | 4.449 | 0.99 | 87  | 244.6 | 2.2 | 6.3  | 0.159 | 0.841 |
| CF19R2 | 186194 | 82.57 | 4.459 | 0.98 | 98  | 233.1 | 2.3 | 6.2  | 0.161 | 0.839 |
| CF19R3 | 215602 | 82.43 | 4.458 | 0.98 | 98  | 233   | 2.2 | 6    | 0.167 | 0.833 |
| CF20R1 | 185496 | 84.19 | 4.463 | 0.98 | 95  | 193   | 2.3 | 6.9  | 0.145 | 0.855 |
| CF20R2 | 197154 | 82.91 | 4.468 | 0.99 | 77  | 177.3 | 2.1 | 5.9  | 0.169 | 0.831 |

|                  |              |         |       |       |          |          |       |       |       |       |
|------------------|--------------|---------|-------|-------|----------|----------|-------|-------|-------|-------|
| <b>n</b>         | 119          | 119     | 119   | 119   | 119      | 119      | 119   | 119   | 0.008 | 0.992 |
| <b>Sum</b>       | 22,308,962.0 | 8,992.9 | 528.8 | 115.5 | 21,870.0 | 50,898.7 | 293.2 | 824.5 | 0.001 | 0.999 |
| <b>Mean</b>      | 187,470.3    | 75.6    | 4.4   | 0.97  | 183.8    | 427.7    | 2.5   | 6.9   | 0.144 | 0.856 |
| <b>Deviation</b> | 24,791.4     | 3.0     | 0.1   | 0.01  | 95.1     | 311.9    | 0.6   | 3.9   | 0.256 | 0.744 |
| <b>Maximum</b>   | 262,032.0    | 84.2    | 4.6   | 0.99  | 563.0    | 1,732.0  | 4.0   | 24.2  | 0.041 | 0.959 |
| <b>Minimum</b>   | 126,600.0    | 72.1    | 4.3   | 0.91  | 69.0     | 124.4    | 1.3   | 2.0   | 0.500 | 0.500 |

Abbreviations: CD, begging fermentation; CF, end fermentation; D, Simpson's Index; 1-D, Inverse Simpson index

**Table S4.** Results of Illumina MiSeq amplicon sequencing of fungal ITS region and microbial community richness and diversity

| <b>Sample</b> | <b>Read Count</b> | <b>Q30 (%)</b> | <b>nseqs</b> | <b>Coverage</b> | <b>Observed (Sobs)</b> | <b>Chao1</b> | <b>Shannon</b> | <b>Simpson's Reciprocal</b> | <b>D</b> | <b>1-D</b> |
|---------------|-------------------|----------------|--------------|-----------------|------------------------|--------------|----------------|-----------------------------|----------|------------|
| CD01R1        | 185,428           | 85.17          | 4749         | 0.9956          | 51                     | 74.3         | 1.97           | 5.67                        | 0.176    | 0.824      |
| CD01R2        | 174,502           | 86.20          | 4756         | 0.9971          | 41                     | 54.0         | 1.92           | 5.46                        | 0.183    | 0.817      |
| CD01R3        | 164,502           | 86.40          | 4757         | 0.9977          | 35                     | 42.9         | 1.79           | 4.88                        | 0.205    | 0.795      |
| CD02R1        | 180,800           | 85.95          | 4741         | 0.9924          | 75                     | 123.5        | 1.77           | 3.22                        | 0.311    | 0.689      |
| CD02R2        | 160,860           | 85.48          | 4744         | 0.9918          | 75                     | 149.1        | 1.84           | 3.77                        | 0.265    | 0.735      |
| CD02R3        | 139,118           | 84.89          | 4743         | 0.9939          | 68                     | 101.8        | 1.76           | 3.34                        | 0.299    | 0.701      |
| CD03R1        | 138,166           | 86.91          | 4740         | 0.9958          | 69                     | 81.7         | 2.15           | 6.01                        | 0.166    | 0.834      |
| CD03R2        | 162,406           | 86.51          | 4740         | 0.9930          | 76                     | 128.8        | 2.09           | 5.56                        | 0.180    | 0.820      |
| CD03R3        | 168,214           | 87.27          | 4727         | 0.9939          | 71                     | 111.6        | 2.07           | 5.55                        | 0.180    | 0.820      |
| CD04R1        | 163,092           | 84.48          | 4738         | 0.9899          | 93                     | 218.3        | 1.96           | 4.82                        | 0.207    | 0.793      |
| CD04R2        | 163,164           | 85.85          | 4728         | 0.9958          | 48                     | 79.7         | 1.88           | 4.91                        | 0.204    | 0.796      |
| CD04R3        | 200,994           | 85.49          | 4740         | 0.9958          | 43                     | 74.7         | 1.64           | 4.05                        | 0.247    | 0.753      |
| CD05R1        | 171,092           | 88.15          | 4737         | 0.9886          | 127                    | 192.0        | 2.80           | 8.44                        | 0.118    | 0.882      |
| CD05R2        | 173,530           | 87.31          | 4739         | 0.9888          | 117                    | 203.1        | 2.62           | 6.84                        | 0.146    | 0.854      |
| CD05R3        | 215,170           | 87.35          | 4736         | 0.9882          | 118                    | 199.1        | 2.54           | 5.82                        | 0.172    | 0.828      |
| CD06R1        | 138,110           | 82.13          | 4738         | 0.9897          | 100                    | 178.4        | 2.28           | 4.97                        | 0.201    | 0.799      |
| CD06R2        | 128,076           | 82.22          | 4750         | 0.9888          | 119                    | 172.0        | 2.65           | 8.91                        | 0.112    | 0.888      |
| CD06R3        | 149,286           | 86.07          | 4733         | 0.9818          | 165                    | 347.8        | 2.75           | 6.72                        | 0.149    | 0.851      |
| CD07R1        | 166,754           | 87.81          | 4741         | 0.9861          | 110                    | 236.2        | 1.86           | 3.16                        | 0.316    | 0.684      |
| CD07R2        | 202,218           | 88.36          | 4743         | 0.9871          | 114                    | 205.5        | 1.68           | 2.45                        | 0.408    | 0.592      |
| CD07R3        | 192,332           | 88.64          | 4736         | 0.9873          | 102                    | 262.9        | 1.66           | 2.53                        | 0.396    | 0.604      |
| CD08R1        | 190,962           | 87.49          | 4736         | 0.9924          | 86                     | 123.1        | 1.96           | 4.24                        | 0.236    | 0.764      |
| CD08R2        | 171,434           | 87.42          | 4724         | 0.9875          | 119                    | 196.8        | 2.22           | 5.67                        | 0.176    | 0.824      |
| CD08R3        | 195,548           | 86.32          | 4725         | 0.9860          | 115                    | 310.0        | 2.11           | 4.58                        | 0.218    | 0.782      |
| CD09R1        | 156,160           | 85.49          | 4759         | 0.9924          | 72                     | 177.0        | 1.68           | 2.75                        | 0.364    | 0.636      |
| CD09R2        | 143,112           | 83.07          | 4732         | 0.9918          | 94                     | 143.4        | 2.51           | 7.57                        | 0.132    | 0.868      |
| CD09R3        | 171,400           | 84.26          | 4737         | 0.9907          | 90                     | 184.6        | 2.15           | 4.48                        | 0.223    | 0.777      |
| CD10R1        | 149,748           | 83.35          | 4750         | 0.9878          | 117                    | 195.7        | 1.65           | 2.32                        | 0.431    | 0.569      |
| CD10R2        | 162,948           | 83.51          | 4749         | 0.9832          | 122                    | 473.1        | 1.55           | 2.25                        | 0.444    | 0.556      |

|        |         |       |      |        |     |       |      |      |       |       |
|--------|---------|-------|------|--------|-----|-------|------|------|-------|-------|
| CD10R3 | 143,228 | 82.81 | 4749 | 0.9878 | 107 | 204.2 | 1.31 | 1.81 | 0.553 | 0.447 |
| CD11R1 | 168,500 | 84.21 | 4745 | 0.9941 | 56  | 103.3 | 1.74 | 3.21 | 0.312 | 0.688 |
| CD11R2 | 143,092 | 80.50 | 4750 | 0.9952 | 52  | 75.0  | 1.55 | 2.68 | 0.373 | 0.627 |
| CD11R3 | 178,322 | 83.98 | 4757 | 0.9958 | 50  | 67.3  | 1.51 | 2.83 | 0.353 | 0.647 |
| CD12R1 | 156,814 | 82.23 | 4749 | 0.9941 | 61  | 98.8  | 1.17 | 1.83 | 0.546 | 0.454 |
| CD12R2 | 153,522 | 83.51 | 4756 | 0.9950 | 54  | 84.7  | 1.10 | 1.75 | 0.571 | 0.429 |
| CD12R3 | 158,014 | 84.75 | 4763 | 0.9943 | 50  | 100.1 | 0.77 | 1.42 | 0.706 | 0.294 |
| CD13R1 | 154,502 | 85.78 | 4761 | 0.9937 | 62  | 93.1  | 1.05 | 1.64 | 0.608 | 0.392 |
| CD13R2 | 125,482 | 85.69 | 4757 | 0.9958 | 41  | 136.0 | 0.94 | 1.54 | 0.648 | 0.352 |
| CD13R3 | 147,840 | 86.88 | 4753 | 0.9926 | 64  | 163.2 | 1.39 | 2.06 | 0.484 | 0.516 |
| CD14R1 | 181,654 | 83.18 | 4747 | 0.9962 | 40  | 57.0  | 1.36 | 3.01 | 0.332 | 0.668 |
| CD14R2 | 139,638 | 84.56 | 4786 | 0.9937 | 44  | 131.0 | 1.40 | 3.33 | 0.301 | 0.699 |
| CD14R3 | 134,470 | 83.32 | 4744 | 0.9939 | 51  | 152.5 | 1.36 | 2.81 | 0.356 | 0.644 |
| CD15R1 | 154,982 | 85.57 | 4729 | 0.9776 | 184 | 415.9 | 2.44 | 5.54 | 0.180 | 0.820 |
| CD15R2 | 169,684 | 86.31 | 4734 | 0.9816 | 156 | 376.1 | 2.38 | 4.49 | 0.223 | 0.777 |
| CD15R3 | 181,574 | 85.07 | 4727 | 0.9757 | 204 | 376.5 | 2.56 | 5.50 | 0.182 | 0.818 |
| CD16R1 | 173,234 | 82.57 | 4740 | 0.9954 | 58  | 77.3  | 1.37 | 2.25 | 0.444 | 0.556 |
| CD16R2 | 176,644 | 82.45 | 4742 | 0.9960 | 57  | 69.2  | 1.41 | 2.30 | 0.434 | 0.566 |
| CD16R3 | 172,242 | 82.0  | 4757 | 0.9964 | 51  | 66.1  | 1.47 | 3.16 | 0.317 | 0.683 |
| CD17R1 | 174,612 | 86.07 | 4750 | 0.9958 | 48  | 79.7  | 1.87 | 4.33 | 0.231 | 0.769 |
| CD17R2 | 134,168 | 83.59 | 4750 | 0.9960 | 56  | 67.4  | 1.96 | 4.56 | 0.220 | 0.780 |
| CD17R3 | 142,056 | 86.90 | 4755 | 0.9962 | 47  | 77.6  | 1.96 | 4.49 | 0.223 | 0.777 |
| CD18R1 | 211,170 | 80.86 | 4757 | 0.9971 | 28  | 73.5  | 1.07 | 2.00 | 0.499 | 0.501 |
| CD18R2 | 159,418 | 79.66 | 4755 | 0.9981 | 27  | 34.2  | 1.01 | 1.95 | 0.514 | 0.486 |
| CD18R3 | 262,566 | 86.03 | 4752 | 0.9979 | 31  | 36.6  | 1.17 | 2.25 | 0.445 | 0.555 |
| CD19R1 | 181,020 | 81.49 | 4785 | 0.9939 | 51  | 101.8 | 1.45 | 2.77 | 0.360 | 0.640 |
| CD19R2 | 228,264 | 82.08 | 4788 | 0.9887 | 76  | 362.2 | 1.56 | 2.96 | 0.338 | 0.662 |
| CD19R3 | 193,152 | 83.98 | 4787 | 0.9916 | 58  | 214.0 | 1.57 | 3.52 | 0.284 | 0.716 |
| CD20R1 | 269,076 | 86.35 | 4781 | 0.9944 | 55  | 113.5 | 1.35 | 2.42 | 0.413 | 0.587 |
| CD20R2 | 202,976 | 85.75 | 4776 | 0.9943 | 56  | 106.1 | 1.50 | 3.32 | 0.301 | 0.699 |
| CD20R3 | 181,290 | 84.39 | 4780 | 0.9914 | 67  | 272.0 | 1.40 | 2.55 | 0.392 | 0.608 |
| CF01R1 | 171,926 | 88.09 | 4734 | 0.9873 | 120 | 204.3 | 2.58 | 7.47 | 0.134 | 0.866 |
| CF01R2 | 184,936 | 87.72 | 4743 | 0.9903 | 92  | 178.3 | 2.29 | 4.85 | 0.206 | 0.794 |
| CF01R3 | 166,396 | 88.16 | 4731 | 0.9873 | 118 | 211.2 | 2.58 | 7.61 | 0.131 | 0.869 |
| CF02R1 | 165,016 | 88.05 | 4740 | 0.9899 | 101 | 187.8 | 2.17 | 4.81 | 0.208 | 0.792 |
| CF02R2 | 169,998 | 87.08 | 4725 | 0.9896 | 108 | 192.0 | 2.37 | 5.53 | 0.181 | 0.819 |
| CF02R3 | 117,404 | 88.65 | 4736 | 0.9884 | 107 | 221.2 | 2.23 | 4.88 | 0.205 | 0.795 |
| CF03R1 | 140,270 | 87.94 | 4753 | 0.9914 | 90  | 172.0 | 2.16 | 4.50 | 0.222 | 0.778 |
| CF03R2 | 149,784 | 88.16 | 4749 | 0.9891 | 92  | 202.5 | 1.88 | 3.69 | 0.271 | 0.729 |
| CF03R3 | 181,436 | 87.94 | 4762 | 0.9912 | 67  | 162.7 | 1.36 | 2.35 | 0.425 | 0.575 |
| CF04R1 | 141,128 | 88.58 | 4721 | 0.9814 | 150 | 362.7 | 2.13 | 3.87 | 0.259 | 0.741 |

|        |         |       |      |        |     |       |      |       |       |       |
|--------|---------|-------|------|--------|-----|-------|------|-------|-------|-------|
| CF04R2 | 136,258 | 88.35 | 4719 | 0.9860 | 112 | 231.2 | 1.80 | 3.17  | 0.316 | 0.684 |
| CF04R3 | 143,864 | 89.23 | 4722 | 0.9748 | 200 | 412.8 | 2.36 | 4.56  | 0.219 | 0.781 |
| CF05R1 | 171,474 | 88.20 | 4742 | 0.9812 | 138 | 494.0 | 1.85 | 2.86  | 0.349 | 0.651 |
| CF05R2 | 150,772 | 87.99 | 4727 | 0.9568 | 324 | 899.2 | 3.29 | 10.33 | 0.097 | 0.903 |
| CF05R3 | 97,110  | 87.65 | 4736 | 0.9799 | 157 | 454.7 | 2.36 | 5.26  | 0.190 | 0.810 |
| CF06R1 | 132,058 | 87.43 | 4727 | 0.9909 | 97  | 157.2 | 2.45 | 7.74  | 0.129 | 0.871 |
| CF06R2 | 181,432 | 86.83 | 4719 | 0.9924 | 89  | 137.5 | 2.37 | 6.46  | 0.155 | 0.845 |
| CF06R3 | 165,054 | 87.42 | 4744 | 0.9901 | 84  | 219.1 | 1.79 | 3.16  | 0.316 | 0.684 |
| CF07R1 | 133,316 | 87.97 | 4751 | 0.9878 | 109 | 345.1 | 2.53 | 6.46  | 0.155 | 0.845 |
| CF07R2 | 167,210 | 89.19 | 4739 | 0.9880 | 112 | 211.8 | 2.33 | 5.33  | 0.188 | 0.812 |
| CF07R3 | 179,508 | 88.08 | 4750 | 0.9863 | 137 | 204.1 | 2.38 | 5.22  | 0.192 | 0.808 |
| CF08R1 | 179,348 | 88.24 | 4755 | 0.9941 | 64  | 98.4  | 1.80 | 4.31  | 0.232 | 0.768 |
| CF08R2 | 174,666 | 89.29 | 4752 | 0.9949 | 61  | 88.6  | 1.88 | 4.69  | 0.213 | 0.787 |
| CF08R3 | 130,370 | 88.23 | 4755 | 0.9939 | 72  | 103.2 | 2.01 | 4.97  | 0.201 | 0.799 |
| CF09R1 | 133,900 | 86.53 | 4730 | 0.9822 | 173 | 318.3 | 2.59 | 4.40  | 0.227 | 0.773 |
| CF09R2 | 154,744 | 87.62 | 4753 | 0.9935 | 57  | 212.0 | 0.72 | 1.33  | 0.750 | 0.250 |
| CF09R3 | 157,686 | 87.02 | 4746 | 0.9943 | 61  | 92.9  | 1.58 | 3.13  | 0.320 | 0.680 |
| CF10R1 | 123,254 | 82.59 | 4741 | 0.9960 | 52  | 76.4  | 1.71 | 3.19  | 0.314 | 0.686 |
| CF10R2 | 154,956 | 83.55 | 4745 | 0.9958 | 54  | 92.0  | 1.89 | 4.35  | 0.230 | 0.770 |
| CF10R3 | 154,824 | 82.06 | 4811 | 0.9875 | 117 | 205.5 | 1.90 | 3.60  | 0.278 | 0.722 |
| CF11R1 | 135,518 | 86.83 | 4753 | 0.9950 | 48  | 82.5  | 1.30 | 2.22  | 0.450 | 0.550 |
| CF11R2 | 163,138 | 87.94 | 4762 | 0.9966 | 46  | 56.9  | 1.33 | 2.25  | 0.445 | 0.555 |
| CF11R3 | 169,730 | 87.61 | 4756 | 0.9952 | 47  | 97.6  | 1.37 | 2.31  | 0.432 | 0.568 |
| CF12R1 | 156,682 | 87.44 | 4749 | 0.9958 | 47  | 74.1  | 1.75 | 3.86  | 0.259 | 0.741 |
| CF12R2 | 174,894 | 87.50 | 4760 | 0.9947 | 44  | 344.0 | 1.93 | 5.23  | 0.191 | 0.809 |
| CF12R3 | 170,704 | 87.93 | 4792 | 0.9887 | 74  | 278.4 | 1.51 | 3.43  | 0.291 | 0.709 |
| CF13R1 | 162,764 | 85.77 | 4751 | 0.9962 | 41  | 92.0  | 1.57 | 3.46  | 0.289 | 0.711 |
| CF13R2 | 198,488 | 88.54 | 4748 | 0.9949 | 51  | 78.6  | 1.59 | 3.55  | 0.282 | 0.718 |
| CF13R3 | 152,230 | 85.73 | 4745 | 0.9962 | 41  | 92.0  | 1.65 | 3.62  | 0.276 | 0.724 |
| CF14R1 | 154,896 | 87.58 | 4749 | 0.9954 | 57  | 85.9  | 1.69 | 3.15  | 0.317 | 0.683 |
| CF14R2 | 151,288 | 87.17 | 4757 | 0.9922 | 74  | 240.5 | 1.71 | 2.92  | 0.342 | 0.658 |
| CF14R3 | 148,676 | 87.46 | 4749 | 0.9962 | 51  | 102.0 | 1.72 | 3.20  | 0.313 | 0.687 |
| CF15R1 | 147,372 | 88.19 | 4757 | 0.9958 | 61  | 73.7  | 2.02 | 4.75  | 0.210 | 0.790 |
| CF15R2 | 192,734 | 88.10 | 4756 | 0.9937 | 72  | 105.5 | 1.98 | 4.10  | 0.244 | 0.756 |
| CF15R3 | 171,154 | 87.03 | 4753 | 0.9956 | 61  | 73.4  | 1.90 | 4.17  | 0.240 | 0.760 |
| CF16R1 | 182,168 | 86.85 | 4744 | 0.9888 | 97  | 183.1 | 1.42 | 2.07  | 0.484 | 0.516 |
| CF16R2 | 170,206 | 88.37 | 4754 | 0.9914 | 77  | 128.3 | 1.12 | 1.70  | 0.588 | 0.412 |
| CF16R3 | 167,814 | 87.46 | 4747 | 0.9880 | 92  | 225.0 | 1.43 | 2.19  | 0.456 | 0.544 |
| CF17R1 | 166,292 | 88.65 | 4743 | 0.9964 | 40  | 74.0  | 1.47 | 3.35  | 0.298 | 0.702 |
| CF17R2 | 183,940 | 86.19 | 4756 | 0.9966 | 42  | 55.3  | 1.52 | 3.58  | 0.279 | 0.721 |
| CF17R3 | 202,878 | 87.03 | 4749 | 0.9973 | 35  | 61.0  | 1.64 | 3.91  | 0.256 | 0.744 |

|                  |            |            |            |            |            |              |               |               |               |               |
|------------------|------------|------------|------------|------------|------------|--------------|---------------|---------------|---------------|---------------|
| <b>CF18R1</b>    | 219,428    | 86.59      | 4759       | 0.9973     | 46         | 59.0         | 1.41          | 2.45          | 0.408         | 0.592         |
| <b>CF18R2</b>    | 206,672    | 86.82      | 4760       | 0.9981     | 36         | 42.0         | 1.08          | 1.81          | 0.554         | 0.446         |
| <b>CF18R3</b>    | 208,824    | 86.82      | 4764       | 0.9979     | 33         | 40.5         | 1.12          | 2.02          | 0.496         | 0.504         |
| <b>CF19R1</b>    | 193,336    | 85.19      | 4764       | 0.9943     | 47         | 134.8        | 0.73          | 1.36          | 0.733         | 0.267         |
| <b>CF19R2</b>    | 181,020    | 85.17      | 4762       | 0.9962     | 37         | 88.0         | 0.76          | 1.38          | 0.723         | 0.277         |
| <b>CF19R3</b>    | 193,634    | 85.80      | 4767       | 0.9956     | 38         | 108.0        | 0.74          | 1.39          | 0.719         | 0.281         |
| <b>CF20R1</b>    | 189,956    | 86.31      | 4778       | 0.9929     | 62         | 202.3        | 1.65          | 3.80          | 0.263         | 0.737         |
| <b>CF20R2</b>    | 236,916    | 81.72      | 4780       | 0.9935     | 62         | 108.5        | 1.68          | 3.91          | 0.256         | 0.744         |
| <b>CF20R3</b>    | 266,442    | 86.78      | 4773       | 0.9954     | 53         | 99.2         | 1.61          | 3.19          | 0.314         | 0.686         |
| <b>n</b>         | <b>120</b> | <b>120</b> | <b>120</b> | <b>120</b> | <b>120</b> | <b>120.0</b> | <b>120.00</b> | <b>120.00</b> | <b>120.00</b> | <b>120.00</b> |
| <b>Sum</b>       | 20,262,224 | 10,322     | 569,925    | 119        | 9,601      | 20060.9      | 213.38        | 465.65        | 37.73         | 82.27         |
| <b>Mean</b>      | 168,713    | 86         | 4,749      | 1          | 80         | 168.0        | 1.78          | 3.87          | 0.32          | 0.68          |
| <b>Deviation</b> | 28,548     | 2          | 16         | 0          | 44         | 122.6        | 0.50          | 1.74          | 0.15          | 0.15          |
| <b>Maximum</b>   | 97,110     | 80         | 4,719      | 0.957      | 27         | 34.2         | 0.72          | 1.33          | 0.10          | 0.25          |
| <b>Minimum</b>   | 269,076    | 89         | 4,811      | 0.998      | 324        | 899.2        | 3.29          | 10.33         | 0.75          | 0.90          |

Abbreviations: CD, beggining fermentation; CF, end fermentation; D, Simpson's Index; 1-D, Inverse Simpson index
